# Supplementary material
Source: Springer Nature journal article supplement (https://www.springermedizin.de/resource/supplementary/12906_2014_1913_MOESM3_ESM.pdf/9523188)

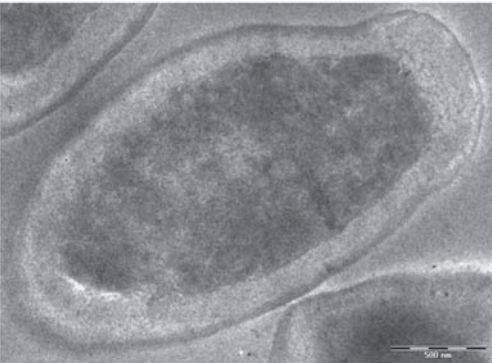

**A**

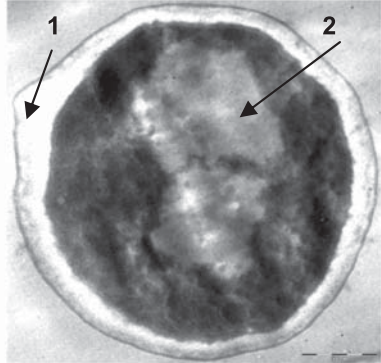

**B**

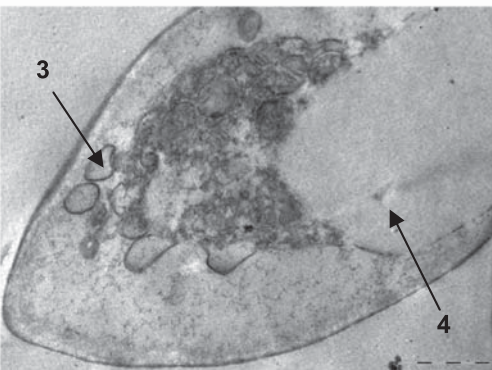

**C**

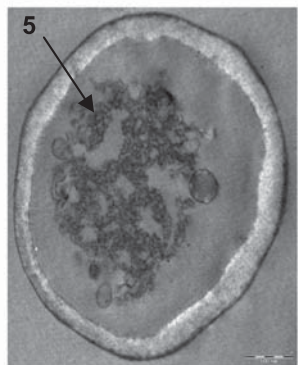

**D**

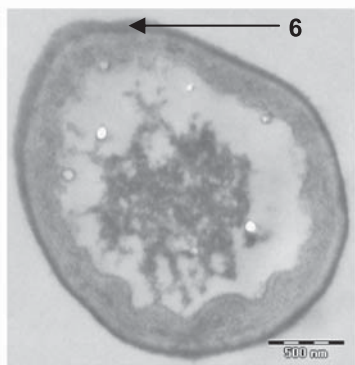

**E**

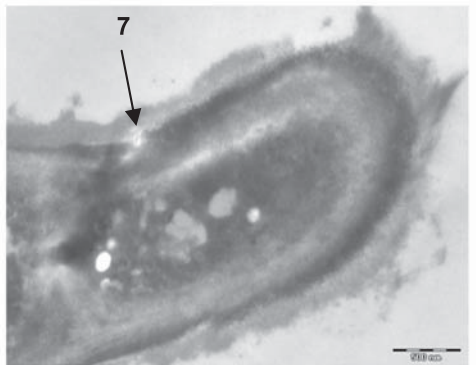

**F**

Supplement: MOESM3 [file 9523188]
